# Supplementary material for: Assessing and predicting drug-induced anticholinergic risks: an integrated computational approach
Source: PubMed Central journal article supplement — Ther Adv Drug Saf. 2017 Aug 25;8(11):361–70. doi: 10.1177/2042098617725267 (PMC5638173; doi:10.1177/2042098617725267), 2017-08-25
Supplement: SM_Therapeutic_Advances_in_Drug_Safety_R1.pdf [file SM_Therapeutic_Advances_in_Drug_Safety_R1.pdf]

## **Supplementary Material**

**Assessing and Predicting Drug-Induced Anticholinergic Risks: An Integrated  
Computational Approach**

## QSAR Model for Overall ADE Risk Prediction

MLR Regression Statistics:

| S.D.   | R-Squared | F(8.0,16.0) | P         |
|--------|-----------|-------------|-----------|
| 0.0893 | 0.8336    | 10.0        | 6.014e-05 |

MLR Regression Coefficients and T-Values:

| Variable  | Coefficient | Std. Err.  | T      |
|-----------|-------------|------------|--------|
| Intercept | 3.4186e+00  | 5.6869e-01 | 6.0113 |
| volume    | -4.5464e-03 | 9.0792e-04 | 5.0075 |
| accptHB   | 3.7660e-01  | 8.0138e-02 | 4.6995 |
| QPpolrz   | 3.7735e-02  | 1.5051e-02 | 2.5071 |
| QPPCaco   | -2.4387e-04 | 4.5767e-05 | 5.3285 |
| PSA       | -2.1764e-02 | 3.8609e-03 | 5.6369 |
| CNS       | -4.3910e-01 | 9.9107e-02 | 4.4306 |
| QPlogKhsa | 1.0647e+00  | 2.4502e-01 | 4.3455 |
| ATS       | -6.8080e-03 | 1.6991e-02 | 0.4007 |

Cross Validation leave-1-out Results Over 500 Cycles

| q <sup>2</sup> | RMS    |
|----------------|--------|
| 0.6350         | 0.1094 |

Predicted Results:

|    | ADE    | Prediction |
|----|--------|------------|
| 1  | 0.2449 | 0.2613     |
| 2  | 0.2050 | 0.2269     |
| 3  | 0.0580 | 0.0597     |
| 4  | 0.0203 | 0.0496     |
| 5  | 0.0443 | 0.0536     |
| 6  | 0.0920 | 0.0808     |
| 7  | 0.3067 | 0.4924     |
| 8  | 0.3995 | 0.4397     |
| 9  | 0.1812 | 0.2199     |
| 10 | 0.3501 | 0.4047     |
| 11 | 0.4308 | 0.3603     |
| 12 | 0.2278 | 0.2192     |
| 13 | 0.2645 | 0.3003     |
| 14 | 0.7273 | 0.7586     |
| 15 | 0.1387 | 0.1432     |
| 16 | 0.1543 | 0.1530     |
| 17 | 0.1129 | 0.0713     |
| 18 | 0.1067 | 0.1103     |
| 19 | 0.2576 | 0.1319     |
| 20 | 0.0743 | 0.1218     |
| 21 | 0.2245 | 0.1765     |
| 22 | 0.3011 | 0.0688     |
| 23 | 0.1305 | 0.1657     |
| 24 | 0.0951 | 0.0715     |
| 25 | 0.4960 | 0.5031     |

RMS 0.0715

## QSAR Model for M2 Receptor Subtype Specific Tachycardia Risks Prediction

MLR Regression Statistics:

| S.D.   | R-Squared | F(8.0,16.0) | P         |
|--------|-----------|-------------|-----------|
| 0.9049 | 0.6756    | 4.2         | 7.342e-03 |

MLR Regression Coefficients and T-Values:

| Variable  | Coefficient | Std. Err.  | T      |
|-----------|-------------|------------|--------|
| Intercept | 1.8798e+01  | 5.7595e+00 | 3.2638 |
| volume    | -2.7489e-02 | 9.3569e-03 | 2.9378 |
| accptHB   | 2.5330e+00  | 8.0712e-01 | 3.1384 |
| QPpolrz   | 1.5014e-01  | 1.5769e-01 | 0.9521 |
| QPPCaco   | -1.2016e-03 | 4.5880e-04 | 2.6190 |
| PSA       | -9.2798e-02 | 3.9071e-02 | 2.3751 |
| CNS       | -1.8692e+00 | 9.8024e-01 | 1.9069 |
| QPlogKhsa | 8.7303e+00  | 2.4858e+00 | 3.5120 |
| M2        | -2.0588e-01 | 7.9704e-01 | 0.2583 |

Cross Validation leave-1-out Results Over 500 Cycles

| q <sup>2</sup> | RMS    |
|----------------|--------|
| 0.2864         | 1.2757 |

Predicted Results:

|    | Tachycardia | Prediction |
|----|-------------|------------|
| 1  | 1.7982      | 1.9703     |
| 2  | 1.4119      | 1.1620     |
| 3  | 0.3971      | 0.1415     |
| 4  | -0.0993     | 0.0990     |
| 5  | 0.2418      | 0.0999     |
| 6  | 0.1483      | 0.2697     |
| 7  | 1.8223      | 3.8799     |
| 8  | 2.3141      | 2.5209     |
| 9  | 1.2079      | 1.9685     |
| 10 | 2.7498      | 3.8099     |
| 11 | 3.2106      | 3.9140     |
| 12 | 2.1043      | 1.4592     |
| 13 | 2.3036      | 2.4788     |
| 14 | 4.2419      | 3.1312     |
| 15 | 1.5700      | 1.0782     |
| 16 | 0.8103      | 1.2951     |
| 17 | 0.9425      | 0.4199     |
| 18 | 0.5431      | 0.4203     |
| 19 | 1.6383      | 0.5073     |
| 20 | 0.4398      | 0.4792     |
| 21 | 1.5460      | 1.0486     |
| 22 | 1.7526      | 0.3073     |
| 23 | 0.8639      | 0.9009     |
| 24 | 0.3371      | 0.3584     |
| 25 | 2.7128      | 3.2891     |

RMS 0.7239

## Adsorption and Distribution Parameter Definitions

**volume** - Total solvent-accessible volume in cubic angstroms using a probe with a 1.4 Å radius. 500.0 – 2000.0.

**accptHB** - Estimated number of hydrogen bonds that would be accepted by the solute from water molecules in an aqueous solution. Values are averages taken over a number of configurations, 2.0 – 20.0.

**QPpolrz** - Predicted polarizability in cubic angstroms. 13.0 – 70.0.

**QPPCaco** - Predicted apparent Caco-2 cell permeability in nm/sec. Caco-2 cells are a model for the gut-blood barrier. <25 poor, >500 great.

**PSA** - Van der Waals surface area of polar nitrogen and oxygen atoms and carbonyl carbon atoms. 7.0 – 200.0.

**CNS** - Predicted central nervous system activity on a –2 (inactive) to +2 (active) scale. –2 to +2.

**QPlogKhsa** - Prediction of binding to human serum albumin. –1.5 – 1.5.

Table S1. Parameters used in the QSAR models.

| Drug             | volume   | accptHB | QPpolrz  | QPPCaco   | PSA      | CNS | QPlogKhsa | M2   | ATS  | ADE      | Tachycardia |
|------------------|----------|---------|----------|-----------|----------|-----|-----------|------|------|----------|-------------|
| Amitriptyline    | 1000.87  | 2       | 34.818   | 2409.037  | 4.935    | 2   | 0.861     | 1    | 5    | 0.261278 | 1.970250877 |
| Imipramine       | 1008.659 | 2.5     | 34.425   | 2285.564  | 7.008    | 2   | 0.708     | 1    | 5    | 0.226893 | 1.16196066  |
| Brompheniramine  | 951.545  | 3       | 31.319   | 2144.512  | 14.401   | 2   | 0.366     | 0.43 | 3.11 | 0.059741 | 0.141500628 |
| Carbinoxamine    | 995.114  | 4.7     | 32.55    | 1833.004  | 23.882   | 2   | -0.005    | 0.65 | 3.25 | 0.049562 | 0.098988995 |
| Chlorpheniramine | 942.788  | 3       | 30.975   | 2144.569  | 14.4     | 2   | 0.34      | 1    | 5    | 0.053644 | 0.099911521 |
| Diphenhydramine  | 952.578  | 3.7     | 31.4     | 2266.311  | 11.817   | 2   | 0.139     | 1    | 5    | 0.080826 | 0.269693488 |
| Benztropine      | 1064.23  | 3.7     | 36.995   | 2206.8125 | 9.005    | 2   | 0.548     | 1    | 5    | 0.492372 | 3.879938204 |
| Trihexyphenidyl  | 1080.575 | 2.75    | 34.759   | 1436.145  | 21.074   | 1   | 0.778     | 1    | 5    | 0.439721 | 2.520863805 |
| Chlorpromazine   | 986.932  | 2.5     | 33.056   | 2439.532  | 5.413    | 2   | 0.644     | 1    | 5    | 0.219905 | 1.96849806  |
| Haloperidol      | 1182.367 | 4.75    | 40.017   | 621.387   | 48.905   | 1   | 0.647     | 0.39 | 3.78 | 0.404702 | 3.809857219 |
| Perphenazine     | 1248.073 | 6.2     | 41.661   | 157       | 36.479   | 2   | 0.485     | 0.78 | 3.9  | 0.360327 | 3.91397275  |
| Risperidone      | 1302.939 | 7.5     | 45.503   | 344.703   | 70.564   | 1   | 0.267     | 1    | 5    | 0.219176 | 1.459168537 |
| Thioridazine     | 1205.652 | 3       | 42.097   | 2174.905  | 7.745    | 2   | 1.146     | 1    | 5    | 0.300272 | 2.478849408 |
| Trifluoperazine  | 1193.702 | 4.5     | 41.136   | 529.451   | 10.741   | 2   | 0.71      | 0.7  | 3.83 | 0.758583 | 3.1311782   |
| Alprazolam       | 929.865  | 3       | 33.562   | 1896.1    | 50.144   | 1   | 0.515     | 0    | 0.6  | 0.14316  | 1.078197909 |
| Clorazepate      | 893.072  | 3.5     | 31.591   | 69.655    | 101.1    | -1  | 0.071     | 0.34 | 1.7  | 0.152955 | 1.295072344 |
| Diazepam         | 886.914  | 4       | 31.878   | 2677.188  | 46.321   | 1   | 0.123     | 0.4  | 2    | 0.071299 | 0.419851718 |
| Atropine         | 964.6708 | 4.7     | 30.58375 | 453.4595  | 55.69775 | 1   | -0.051    | 1    | 5    | 0.110323 | 0.420257806 |
| Dicyclomine      | 1140.826 | 4       | 35.649   | 1482.264  | 29.197   | 1   | 0.605     | 1    | 5    | 0.131856 | 0.507304269 |
| Hyoscyamine      | 973.172  | 4.7     | 30.891   | 441.2675  | 57.2995  | 1   | -0.026    | 1    | 5    | 0.12182  | 0.47921721  |
| Loperamide       | 1478.331 | 5.75    | 52.584   | 594.462   | 44.257   | 1   | 0.884     | 0.49 | 2.45 | 0.176487 | 1.048567097 |
| Promethazine     | 935.069  | 2.5     | 32.126   | 2096.845  | 7.678    | 2   | 0.536     | 1    | 5    | 0.068759 | 0.30730484  |
| Ranitidine       | 1085.084 | 6       | 31.887   | 194.381   | 78.44    | 0   | -0.051    | 0.65 | 1.3  | 0.16574  | 0.900897948 |
| Orphenadrine     | 993.702  | 3.7     | 32.754   | 2115.505  | 12.939   | 2   | 0.258     | 1    | 5    | 0.071464 | 0.358387866 |
| Fentanyl         | 1193.35  | 5       | 41.056   | 1082.641  | 33.745   | 1   | 0.49      | 0.42 | 1.99 | 0.503057 | 3.289068717 |
